# Supplementary material for: Unusual reactivity of N-acyl imides: N-aroyl-1,2,4-dithiazolidine-3,5-diones as acyl isocyanate equivalents
Source: Royal Society of Chemistry journal article supplement (doi:10.1039/b814677b), 2008-01-01
Supplement: b814677b.pdf [file b814677b.pdf]

**Unusual reactivity of *N*-acyl imides: *N*-aroyl-1,2,4-dithiazolidine-3,5-diones as acyl isocyanate equivalents**

Mark E. Wood,<sup>\*a</sup> Victoria M. Annis<sup>a</sup> and Clifford D. Jones<sup>b</sup>

<sup>a</sup>School of Biosciences, University of Exeter, Geoffrey Pope Building, Stocker Road, Exeter, EX4 4QD, UK. Tel: +44 1329 263450; E-mail: m.e.wood@exeter.ac.uk

<sup>b</sup>AstraZeneca, Cancer and Infection Chemistry, Mereside, Alderley Park, Macclesfield, SK10 4TG, UK

## General experimental procedure for the preparation of *N*-aroyl-1,2,4-dithiazolidine-3,5-diones

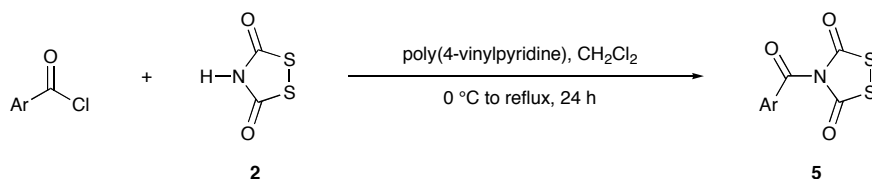

The acid chloride (1.00 mmol) was added dropwise to a stirred solution of 1,2,4-dithiazolidine-3,5-dione (100 mg, 0.74 mmol) in anhydrous dichloromethane (10  $\text{cm}^3$ ) containing poly(4-vinylpyridine) (116 mg), under a nitrogen atmosphere at 0 °C. The reaction mixture was allowed to warm to room temperature before heating under reflux for 24 h, after which time, the poly(4-vinylpyridine) was filtered off and the solvent was removed *in vacuo*. Recrystallisation by slow diffusion of pentane into a chloroform solution of the resulting residue at room temperature, gave the *N*-aroyl-1,2,4-dithiazolidine-3,5-dione as white needles.

## Analytical/spectroscopic data for *N*-aroyl-1,2,4-dithiazolidine-3,5-diones

### *N*-Benzoyl-1,2,4-dithiazolidine-3,5-dione 5a

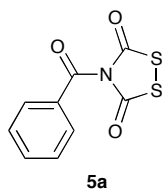

mp 94–96 °C

**Found:** C, 45.15; H, 1.98; N, 5.91.  $\text{C}_9\text{H}_7\text{NO}_3\text{S}_2$  requires C, 45.18; H, 2.11; N, 5.85%

$\nu_{\text{max}}/\text{cm}^{-1}$  (KBr disc) 3073–2085 (w), 1763 (m), 1738 (s), 1710 (s), 1698 (s), 1677 (s), 1656 (s), 1259 (s), 1254 (m), 1180 (m), 1165 (m), 775 (m) and 679 (m)

$\delta_{\text{H}}$  (300 MHz;  $\text{CDCl}_3$ ) 7.58 (2H, *ca* t,  $J = 7.5$ , phenylCH), 7.76 (1H, *ca* t,  $J = 6.0$ , phenylCH) and 7.96 (2H, *ca* d,  $J = 9.0$ , phenylCH)

$\delta_{\text{C}}$  (75 MHz;  $\text{CDCl}_3$ ) 129.4, 129.5, 132.1 (phenylCH), 136.3 (phenyl *ipso*C), 165.0 (PhC(O)) and 165.2 (C(O)NC(O))

$m/z$  (EI) 147 (fragmentation to benzoyl isocyanate, 9%), 105 (100), 77 (35) and 64 (10)

### *N*-(4-Methoxybenzoyl)-1,2,4-dithiazolidine-3,5-dione 5b

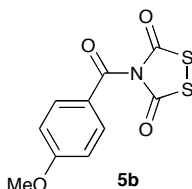

mp 108–109 °C

**Found:** C, 44.49; H, 2.33; N, 5.30.  $\text{C}_{10}\text{H}_7\text{NO}_4\text{S}_2$  requires C, 44.60; H, 2.62; N, 5.20%

$\nu_{\text{max}}/\text{cm}^{-1}$  (Thin film) 2930–2843 (w), 1758 (m), 1735 (m), 1718 (m), 1666 (s), 1596 (s), 1510 (m), 1459 (w), 1425 (w), 1242 (s) and 1167 (s)

$\delta_{\text{H}}$  (300 MHz;  $\text{CDCl}_3$ ) 3.92 (3H, s,  $\text{CH}_3$ ) and 7.01, 7.90 (2 x 2H, AA'BB',  $J = 6.0$ , arylCH)

$\delta_{\text{C}}$  (75 MHz;  $\text{CDCl}_3$ ) 55.9 ( $\text{CH}_3$ ), 115.0 (arylCH), 121.7 (aryl *ipso*C-C=O), 133.9 (arylCH), 163.8 (aryl *ipso*C-O), 165.4 ( $\text{C(O)NC(O)}$ ) and 166.2 (aryl-C(O))

$m/z$  (EI) 177 (fragmentation to 4-methoxybenzoyl isocyanate, 24%), 135 (100), 107 (17), 92 (31), 84 (27), 77 (55), 64 (32), 63 (33), 51 (22), 49 (33) and 44 (18)

#### ***N*-(2-Furoyl)-1,2,4-dithiazolidine-3,5-dione 5c**

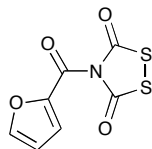

**5c**

**mp** 115-117 °C

**Found:** C, 36.59; H, 1.23; N, 6.21%,  $\text{C}_7\text{H}_3\text{NO}_4\text{S}_2$  requires C, 36.68; H, 1.32; N, 6.11%

$\nu_{\text{max}}/\text{cm}^{-1}$  (Thin film) 3144-3098 (w), 1728 (s), 1698 (s), 1656 (s), 1632 (m), 1462 (m), 1397 (w), 1278 (m), 1183 (m) and 995 (w)

$\delta_{\text{H}}$  (300 MHz;  $\text{CDCl}_3$ ) 6.70 (1H, dd,  $J = 1.6$  and  $3.8$ , furoylCH), 7.55 (1H, d,  $J = 3.8$ , furoylCH) and 7.76 (1H, m, furoylCH)

$\delta_{\text{C}}$  (75 MHz;  $\text{CDCl}_3$ ) 114.2, 125.1 (furoylCH), 145.2 (furoyl *ipso*C), 150.2 (furoylCH), 153.3 (furoylC(O)) and 164.9 ( $\text{C(O)NC(O)}$ )

$m/z$  (EI) 169 ((M-COS)<sup>+</sup>, 25%), 149 (5), 141 (20), 137 (fragmentation to 2-furoyl isocyanate, 5), 111 (11), 105 (6), 95 (100), 86 (10), 84 (18), 49 (20) and 39 (27)
